# Supplementary material
Source: PubMed Central journal article supplement (PMC4863204)
Supplement: aasm.39.6.1179s1.pdf [file aasm.39.6.1179s1.pdf]

## Individual subject observations

**Table S1.** Individuals subject AHI scores from pre and post overnight PSG showing NREM, REM for subjects in IMT and placebo training groups at intake and at study close.

**NB: \* Subjects participants who provided blood draws for plasma catecholamine analyses.**

| IMT (n=12) |          |         |            | Placebo (n=12) |          |         |            |
|------------|----------|---------|------------|----------------|----------|---------|------------|
| Subject    | NREM AHI | REM AHI | Time point | Subject        | NREM AHI | REM AHI | Time point |
| F1         | 20.83    | 0.45    | Pre        | M2             | 1.56     | 6.58    | Pre        |
| F1         | 22.71    | 28.24   | Post       | M2             | 6.5      | 27.47   | Post       |
| M3         | 28.8     | 19.67   | Pre        | M4             | 26.14    | 53.74   | Pre        |
| M3         | 42.75    | 23.73   | Post       | M4             | 11.39    | 19.9    | Post       |
| M5         | 1.9      | 11.51   | Pre        | M6             | 2.84     | 21.3    | Pre        |
| M5         | 5.12     | 0.65    | Post       | M6             | 1.32     | 16.2    | Post       |
| M7         | 9.67     | 0       | Pre        | M8             | 1.22     | 15.94   | Pre        |
| M7         | 5.24     | 1.2     | Post       | M8             | 9.98     | 31.3    | Post       |
| M9         | 26.83    | 32.13   | Pre        | M10            | 47.23    | 66.52   | Pre        |
| M9         | 29.7     | 21.11   | Post       | M10            | 68.81    | 53.95   | Post       |
| M11*       | 31.19    | 32.84   | Pre        | F12*           | 15.39    | 55.28   | Pre        |
| M11*       | 61.86    | 66.67   | Post       | F12*           | 15.39    | 55.28   | Post       |
| F13*       | 14.68    | 34.15   | Pre        | F14*           | 26.7     | 38.5    | Pre        |
| F13*       | 10.08    | 7.84    | Post       | F14*           | 22.1     | 34.6    | Post       |
| M15*       | 56.67    | 48      | Pre        | M16*           | 99.62    | 102.86  | Pre        |
| M15*       | 49.33    | 49.06   | Post       | M16*           | 90.2     | 89.73   | Post       |
| M17*       | 15.28    | 49.06   | Pre        | F18*           | 48.98    | 49.47   | Pre        |
| M17*       | 17.45    | 23.13   | Post       | F18*           | 23.66    | 25.62   | Post       |
| M19*       | 22.5     | 54.74   | Pre        | F20*           | 43.46    | 15.48   | Pre        |
| M19*       | 48.92    | 77.42   | Post       | F20*           | 8.14     | 23.08   | Post       |
| F21*       | 2.47     | 7.23    | Pre        | M22*           | 1.36     | 17.42   | Pre        |
| F21*       | 0.53     | 2.71    | Post       | M22*           | 1.06     | 4.94    | Post       |
| F23*       | 21.2     | 26.4    | Pre        | M24*           | 4.77     | 22.64   | Pre        |
| F23*       | 26.8     | 27.3    | Post       | M24*           | 4.45     | 36.08   | Post       |
